# Supplementary material for: First Description of Marinoquinoline Derivatives’ Activity against Toxoplasma gondii
Source: MDPI journal article supplement (doi:10.3390/pharmaceutics16020262), 2024-02-10
Supplement: s1 [file s1]

## First description of marinoquinoline derivatives' activity against *Toxoplasma gondii*

**Luiza Tamie Hirata Diethelm <sup>1</sup>, Amanda Bruno da Silva Bellini Ramos <sup>2</sup>, Giovanna Braga de Lorena <sup>1</sup>,  
Bruna Inácio Trajano <sup>3</sup>, Rafael Dias do Espírito Santo <sup>3</sup>, Renata Priscila Barros de Menezes <sup>4</sup>,  
Marcus Tullius Scotti <sup>4</sup>, Fabio Antonio Colombo <sup>2</sup>, Marcos José Marques <sup>2</sup>, Carlos Roque Duarte Correia <sup>3</sup>  
and Juliana Quero Reimão <sup>1,\*</sup>**

- 1 Laboratory of Preclinical Assays and Research of Alternative Sources of Innovative Therapy for Toxoplasmosis and Other Sickneses (PARASITTOS), Departamento de Morfologia e Patologia Básica, Faculdade de Medicina de Jundiaí, Jundiaí 13202-550, Brazil
  - 2 Departamento de Análises Clínicas e Toxicológicas, Faculdade de Ciências Farmacêuticas, Universidade Federal de Alfenas, Alfenas 371300-001, Brazil; 1amandabellini@gmail.com (A.B.d.S.B.R.); fabio.colombo@unifal-mg.edu.br (F.A.C.); marques.prppg@gmail.com (M.J.M.)
  - 3 Institute of Chemistry, State University of Campinas, Campinas 13083-970, Brazil; diasdoes@ualberta.ca (R.D.d.E.S.); roque@iqm.unicamp.br (C.R.D.C.)
  - 4 Programa de Pós-Graduação em Produtos Naturais e Sintéticos Bioativos (PgPNSB), Instituto de Pesquisa em Fármacos e Medicamentos (IPeFarM), Universidade Federal da Paraíba, João Pessoa 58051-900, Brazil; mtscotti@ccae.ufpb.br (M.T.S.)
- \* Correspondence: julianareimao@g.fmj.br
-

**Supplementary Material Table S1.** Spectroscopic and spectrometric characterization of MQ-2 to MQ-6.

| MQ-2                                                                                                                                                                                                                                                                                                                                                                                                                                                                                                                                                                                                                                                                                                                                |
|-------------------------------------------------------------------------------------------------------------------------------------------------------------------------------------------------------------------------------------------------------------------------------------------------------------------------------------------------------------------------------------------------------------------------------------------------------------------------------------------------------------------------------------------------------------------------------------------------------------------------------------------------------------------------------------------------------------------------------------|
| <p>7-methoxy-4-(4-(piperazin-1-yl)phenyl)-3H-pyrrolo[2,3-c]quinoline</p> <p>Yellow solid. M.P.: 206-207 °C.</p> <p><sup>1</sup>H NMR (500 MHz, DMSO) δ 11.68 (s, 1H), 8.16 (d, J = 8.9 Hz, 1H), 8.00 – 7.91 (m, 2H), 7.55 (d, J = 3.0 Hz, 1H), 7.46 (d, J = 2.6 Hz, 1H), 7.17 (dd, J = 8.8, 2.6 Hz, 1H), 7.14 – 7.06 (m, 3H), 3.90 (s, 3H), 3.25 – 3.16 (m, 4H), 2.95 – 2.89 (m, 4H).</p> <p><sup>13</sup>C NMR (126 MHz, DMSO) δ 157.6, 151.9, 146.1, 143.6, 129.5, 129.3, 128.4, 128.1, 125.9, 124.0, 117.0, 116.4, 114.8, 108.7, 100.6, 55.2, 48.4, 45.2.</p> <p>HRMS (ESI+) m/z calculated for [C<sub>22</sub>H<sub>23</sub>N<sub>4</sub>O<sup>+</sup>]: 359.1866. Found: 359.1867.</p>                                         |
| MQ-3                                                                                                                                                                                                                                                                                                                                                                                                                                                                                                                                                                                                                                                                                                                                |
| <p>tert-butyl (4-(8-chloro-3H-pyrrolo[2,3-c]quinolin-4-yl)phenyl)carbamate</p> <p>Amorphous orange solid.</p> <p><sup>1</sup>H NMR (400 MHz, DMSO) δ 11.92 (s, 1H), 9.62 (s, 1H), 8.39 (d, J = 2.4 Hz, 1H), 8.04 (d, J = 8.9 Hz, 1H), 7.98 – 7.90 (m, 2H), 7.72 – 7.67 (m, 2H), 7.66 – 7.61 (m, 1H), 7.55 (dd, J = 8.9, 2.5 Hz, 1H), 7.29 (d, J = 2.9 Hz, 1H), 1.51 (s, 9H).</p> <p><sup>13</sup>C NMR (101 MHz, DMSO) δ 152.8, 146.4, 140.8, 140.6, 131.4, 131.0, 129.7, 129.2, 128.5, 128.3, 126.8, 126.1, 123.9, 122.2, 118.1, 101.7, 79.4, 28.2.</p> <p>HRMS (ESI+) m/z calculated for [C<sub>22</sub>H<sub>21</sub>ClN<sub>3</sub>O<sub>2</sub><sup>+</sup>]: 394.1317. Found: 394.1322.</p>                                   |
| MQ-4                                                                                                                                                                                                                                                                                                                                                                                                                                                                                                                                                                                                                                                                                                                                |
| <p>tert-butyl (4-(8-(trifluoromethoxy)-3H-pyrrolo[2,3-c]quinolin-4-yl)phenyl)carbamate</p> <p>Amorphous white solid.</p> <p><sup>1</sup>H NMR (400 MHz, Acetone) δ 11.46 (s, 1H), 8.77 (s, 1H), 8.26 – 8.17 (m, 2H), 8.03 – 7.98 (m, 2H), 7.77 – 7.70 (m, 2H), 7.67 – 7.61 (m, 1H), 7.50 (dd, J = 9.8, 2.4 Hz, 1H), 7.26 (d, J = 3.0 Hz, 1H), 1.50 (s, 9H).</p> <p><sup>13</sup>C NMR (63 MHz, DMSO) δ 153.2, 147.2, 145.9 (q, J = 1.9 Hz), 141.3, 141.2, 131.9, 131.8, 129.7, 129.2, 129.0, 127.2, 123.8, 120.8 (q, J = 256.0 Hz), 119.6, 118.5, 115.1, 102.2, 79.8, 28.6.</p> <p>HRMS (ESI+) m/z calculated for [C<sub>23</sub>H<sub>21</sub>F<sub>3</sub>N<sub>3</sub>O<sub>3</sub><sup>+</sup>]: 444.1530. Found: 444.1540.</p> |

(cont.)

## MQ-5

4-(4-(4-fluoropiperidin-1-yl)phenyl)-7-methoxy-3H-pyrrolo[2,3-c]quinoline

Amorphous yellow solid.

$^1\text{H}$  NMR (500 MHz, Acetone)  $\delta$  11.02 (s, 1H), 8.17 (d,  $J$  = 8.8 Hz, 1H), 8.04 – 7.97 (m, 2H), 7.60 (d,  $J$  = 2.9 Hz, 1H), 7.56 (d,  $J$  = 2.6 Hz, 1H), 7.18 (dd,  $J$  = 8.8, 2.6 Hz, 1H), 7.17 – 7.11 (m, 2H), 7.11 (d,  $J$  = 2.9 Hz, 1H), 4.86 (dtt,  $J$  = 49.1, 7.1, 3.5 Hz, 1H), 3.94 (s, 3H), 3.59 – 3.49 (m, 2H), 3.30 (ddd,  $J$  = 12.9, 7.4, 3.7 Hz, 2H), 2.13 – 2.05 (m, 2H), 1.95 – 1.82 (m, 2H).

$^{13}\text{C}$  NMR (126 MHz, Acetone)  $\delta$  159.1, 152.4, 147.2, 145.0, 130.6, 130.5, 129.6, 128.4, 127.4, 124.7, 118.3, 117.5, 116.3, 109.5, 101.5, 89.4 (d,  $J$  = 170.3 Hz), 55.6, 45.8 (d,  $J$  = 6.9 Hz), 31.8 (d,  $J$  = 19.3 Hz).

HRMS (ESI+)  $m/z$  calculated for  $[\text{C}_{23}\text{H}_{23}\text{FN}_3\text{O}^+]$ : 376.1820. Found: 376.1806.

## MQ-6

4-(5-bromopyridin-2-yl)-7-methoxy-3H-pyrrolo[2,3-c]quinoline

[MQ-6]

Yellow solid. M.P. 187-188 °C.

$^1\text{H}$  NMR (500 MHz, DMSO)  $\delta$  12.01 (s, 1H), 8.90 (d,  $J$  = 2.2 Hz, 1H), 8.70 (d,  $J$  = 8.6 Hz, 1H), 8.32 (dd,  $J$  = 8.6, 2.4 Hz, 1H), 8.25 (d,  $J$  = 8.9 Hz, 1H), 7.72 – 7.67 (m, 1H), 7.56 (d,  $J$  = 2.6 Hz, 1H), 7.28 (dd,  $J$  = 8.9, 2.6 Hz, 1H), 7.17 – 7.13 (m, 1H), 3.94 (s, 3H).

$^{13}\text{C}$  NMR (126 MHz, DMSO)  $\delta$  157.8, 155.3, 149.3, 142.8, 140.7, 140.0, 130.3, 128.9, 126.0, 124.2, 123.4, 120.7, 118.3, 118.2, 108.7, 100.0, 55.2.

HRMS (ESI+)  $m/z$  calculated for  $[\text{C}_{17}\text{H}_{13}\text{BrN}_3\text{O}^+]$ : 354.0237. Found: 354.0235.

**Supplementary Material Table S2.** ADMET properties predictions for six marinoquinoline derivatives and pyrimethamine according to SwissModel.

|                                   |                               | MQ-1                                             | MQ-2                                             | MQ-3                                                            | MQ-4                                                                         | MQ-5                                              | MQ-6                                               | PYR <sup>1</sup>                                                             |
|-----------------------------------|-------------------------------|--------------------------------------------------|--------------------------------------------------|-----------------------------------------------------------------|------------------------------------------------------------------------------|---------------------------------------------------|----------------------------------------------------|------------------------------------------------------------------------------|
| <b>Physicochemical properties</b> | Formula Molecular             | C <sub>20</sub> H <sub>15</sub> N <sub>3</sub> O | C <sub>22</sub> H <sub>22</sub> N <sub>4</sub> O | C <sub>22</sub> H <sub>20</sub> ClN <sub>3</sub> O <sub>2</sub> | C <sub>23</sub> H <sub>20</sub> F <sub>3</sub> N <sub>3</sub> O <sub>3</sub> | C <sub>23</sub> H <sub>22</sub> FN <sub>3</sub> O | C <sub>17</sub> H <sub>12</sub> BrN <sub>3</sub> O | C <sub>13</sub> H <sub>8</sub> Cl <sub>2</sub> N <sub>2</sub> O <sub>4</sub> |
|                                   | Molecular Weight              | 313.35                                           | 358.44                                           | 393.87                                                          | 443.42                                                                       | 375.44                                            | 354.2                                              | 248.71                                                                       |
|                                   | #Heavy atoms                  | 24                                               | 27                                               | 28                                                              | 32                                                                           | 28                                                | 22                                                 | 17                                                                           |
|                                   | #Aromatic heavy atoms         | 22                                               | 19                                               | 19                                                              | 19                                                                           | 19                                                | 19                                                 | 12                                                                           |
|                                   | Fraction Csp <sup>3</sup>     | 0.05                                             | 0.23                                             | 0.18                                                            | 0.22                                                                         | 0.26                                              | 0.06                                               | 0.17                                                                         |
|                                   | #Rotatable bonds              | 2                                                | 3                                                | 5                                                               | 7                                                                            | 3                                                 | 2                                                  | 2                                                                            |
|                                   | #H-bond acceptors             | 2                                                | 3                                                | 3                                                               | 7                                                                            | 3                                                 | 3                                                  | 2                                                                            |
|                                   | #H-bond donors                | 2                                                | 2                                                | 2                                                               | 2                                                                            | 1                                                 | 1                                                  | 2                                                                            |
|                                   | MR                            | 97.38                                            | 116.89                                           | 114.29                                                          | 115.96                                                                       | 115.03                                            | 91.02                                              | 71.06                                                                        |
|                                   | TPSA <sup>2</sup>             | 53.7                                             | 53.18                                            | 67.01                                                           | 76.24                                                                        | 41.15                                             | 50.8                                               | 77.82                                                                        |
| <b>Lipophilicity</b>              | iLOGP                         | 2.46                                             | 3.06                                             | 3.76                                                            | 3.88                                                                         | 3.27                                              | 3.31                                               | 2.15                                                                         |
|                                   | XLOGP <sub>3</sub>            | 4.08                                             | 3.42                                             | 5.17                                                            | 5.72                                                                         | 4.97                                              | 3.61                                               | 2.69                                                                         |
|                                   | WLOGP                         | 4.87                                             | 3.04                                             | 6.19                                                            | 7.7                                                                          | 5.37                                              | 4.55                                               | 2.54                                                                         |
|                                   | MLOGP                         | 2.32                                             | 2.08                                             | 3.44                                                            | 2.94                                                                         | 3.23                                              | 2.12                                               | 1.64                                                                         |
|                                   | Silicos-IT Log P              | 5.08                                             | 4.12                                             | 5.14                                                            | 5.13                                                                         | 5.07                                              | 4.66                                               | 2.44                                                                         |
|                                   | Consensus Log P               | 3.76                                             | 3.14                                             | 4.74                                                            | 5.07                                                                         | 4.38                                              | 3.65                                               | 2.29                                                                         |
|                                   | ESOL Log S                    | -4.9                                             | -4.54                                            | -5.71                                                           | -6.17                                                                        | -5.6                                              | -4.82                                              | -4.9                                                                         |
| <b>Water solubility</b>           | ESOL Solubility (mg/ml)       | 3.95e-03                                         | 1.03e-02                                         | 7.66e-04                                                        | 3.00e-04                                                                     | 9.37e-04                                          | 5.39e-03                                           | 0.00395                                                                      |
|                                   | ESOL Solubility (mol/l)       | 1.26e-05                                         | 2.89e-05                                         | 1.94e-06                                                        | 6.76e-07                                                                     | 2.49e-06                                          | 1.52e-05                                           | 0.0000126                                                                    |
|                                   | ESOL Class                    | MS <sup>3</sup>                                  | MS                                               | MS                                                              | PS <sup>4</sup>                                                              | MS                                                | MS                                                 | MS                                                                           |
|                                   | Ali Log S                     | -4.91                                            | -4.22                                            | -6.32                                                           | -7.09                                                                        | -5.57                                             | -4.36                                              | -4.91                                                                        |
|                                   | Ali Solubility (mg/ml)        | 3.83e-03                                         | 2.18e-02                                         | 1.87e-04                                                        | 3.62e-05                                                                     | 1.00e-03                                          | 1.53e-02                                           | 0.00383                                                                      |
|                                   | Ali Solubility (mol/l)        | 1.22e-05                                         | 6.07e-05                                         | 4.75e-07                                                        | 8.17e-08                                                                     | 2.67e-06                                          | 4.32e-05                                           | 0.0000122                                                                    |
|                                   | Ali Class                     | MS                                               | MS                                               | PS                                                              | PS                                                                           | MS                                                | MS                                                 | MS                                                                           |
|                                   | Silicos-IT LogSw              | -8.1                                             | -7.68                                            | -8.6                                                            | -8.56                                                                        | -7.95                                             | -7.67                                              | -8.1                                                                         |
|                                   | Silicos-IT Solubility (mg/ml) | 2.49e-06                                         | 7.44e-06                                         | 9.94e-07                                                        | 1.21e-06                                                                     | 4.25e-06                                          | 7.61e-06                                           | 0.00000249                                                                   |
|                                   | Silicos-IT Solubility (mol/l) | 7.94e-09                                         | 2.07e-08                                         | 2.52e-09                                                        | 2.74e-09                                                                     | 1.13e-08                                          | 2.15e-08                                           | 7.94E-09                                                                     |
|                                   | Silicos-IT class              | PS                                               | PS                                               | PS                                                              | PS                                                                           | PS                                                | PS                                                 | MS                                                                           |

(cont.)

|                                    |                            |       |       |       |       |       |      |       |
|------------------------------------|----------------------------|-------|-------|-------|-------|-------|------|-------|
| <b>Pharmacokinetics properties</b> | GI <sup>5</sup> absorption | High  | High  | High  | Low   | High  | High | High  |
|                                    | BBB <sup>6</sup> permeant  | Yes   | Yes   | No    | No    | Yes   | Yes  | Yes   |
|                                    | Pgp <sup>7</sup> substrate | Yes   | Yes   | No    | No    | Yes   | Yes  | No    |
|                                    | CYP1A2 inhibitor           | Yes   | Yes   | Yes   | Yes   | Yes   | Yes  | Yes   |
|                                    | CYP2C19 inhibitor          | Yes   | No    | Yes   | Yes   | Yes   | Yes  | Yes   |
|                                    | CYP2C9 inhibitor           | No    | No    | Yes   | Yes   | No    | Yes  | No    |
|                                    | CYP2D6 inhibitor           | Yes   | Yes   | Yes   | Yes   | Yes   | Yes  | No    |
|                                    | CYP3A4 inhibitor           | Yes   | Yes   | Yes   | Yes   | Yes   | Yes  | Yes   |
|                                    | log Kp (cm/s)              | -5.31 | -6.06 | -5.03 | -4.94 | -5.06 | -5.9 | -5.91 |
| <b>Drug likeness</b>               | Lipinski #violations       | 0     | 0     | 0     | 0     | 0     | 0    | 0     |
|                                    | Ghose #violations          | 0     | 0     | 1     | 1     | 0     | 0    | 0     |
|                                    | Veber #violations          | 0     | 0     | 0     | 0     | 0     | 0    | 0     |
|                                    | Egan #violations           | 0     | 0     | 1     | 1     | 0     | 0    | 0     |
|                                    | Muegge #violations         | 0     | 0     | 1     | 1     | 0     | 0    | 0     |
|                                    | Bioavailability Score      | 0.55  | 0.55  | 0.55  | 0.55  | 0.55  | 0.55 | 0.55  |
| <b>Medicinal Chemistry</b>         | PAINS #alerts              | 0     | 0     | 0     | 0     | 0     | 0    | 0     |
|                                    | Brenk #alerts              | 0     | 0     | 0     | 0     | 0     | 0    | 0     |
|                                    | Lead likeness #violations  | 1     | 1     | 2     | 2     | 2     | 2    | 1     |
|                                    | Synthetic Accessibility    | 2.58  | 2.85  | 2.95  | 3.11  | 2.81  | 2.63 | 2.43  |
| <b>Toxicity</b>                    | Mutagenic                  | No    | No    | No    | No    | No    | No   | Yes   |
|                                    | Tumorigenic                | No    | No    | No    | No    | No    | No   | Yes   |
|                                    | Reproductive Effective     | No    | No    | No    | No    | No    | No   | Yes   |
|                                    | Irritant                   | No    | No    | No    | No    | No    | No   | Yes   |

<sup>1</sup>Pyrimethamine, used as positive control. <sup>2</sup>Total polar surface area. <sup>3</sup>MS: Moderately soluble. <sup>4</sup>PS: Poorly soluble. <sup>5</sup>Gastrointestinal. <sup>6</sup>Blood-brain barrier. <sup>7</sup>P-glycoprotein substrate.

Supplementary Material Table S3. ADMET properties predictions for six marinoquinoline derivatives and pyrimethamine according to AdmetSAR.

|                                             | MQ-1              | MQ-2              | MQ-3   | MQ-4   | MQ-5              | MQ-6              | PYR <sup>1</sup>  |
|---------------------------------------------|-------------------|-------------------|--------|--------|-------------------|-------------------|-------------------|
| Ames mutagenesis                            | +                 | +                 | +      | +      | +                 | +                 | -                 |
| Acute Oral Toxicity (c)                     | III               | III               | III    | III    | III               | III               | II                |
| Androgen receptor binding                   | +                 | +                 | +      | +      | +                 | +                 | +                 |
| Aromatase binding                           | +                 | +                 | +      | +      | +                 | +                 | +                 |
| Blood Brain Barrier                         | +                 | +                 | +      | +      | +                 | +                 | +                 |
| BRCP inhibitor                              | -                 | -                 | -      | -      | -                 | -                 | -                 |
| BSEP inhibitor                              | +                 | +                 | +      | +      | +                 | +                 | +                 |
| Caco-2                                      | +                 | -                 | -      | -      | -                 | +                 | +                 |
| Carcinogenicity (binary)                    | -                 | -                 | -      | -      | -                 | -                 | -                 |
| Carcinogenicity (trinary)                   | Non-re-<br>quired | Non-re-<br>quired | Danger | Danger | Non-re-<br>quired | Non-re-<br>quired | Non-re-<br>quired |
| CYP1A2 inhibition                           | +                 | +                 | +      | +      | +                 | +                 | +                 |
| CYP2C19 inhibition                          | +                 | -                 | +      | +      | +                 | +                 | -                 |
| CYP2C8 inhibition                           | +                 | +                 | +      | +      | +                 | +                 | +                 |
| CYP2C9 inhibition                           | -                 | -                 | +      | +      | +                 | -                 | -                 |
| CYP2C9 substrate                            | -                 | -                 | -      | -      | -                 | -                 | -                 |
| CYP2D6 inhibition                           | +                 | -                 | -      | -      | -                 | +                 | +                 |
| CYP2D6 substrate                            | -                 | +                 | -      | -      | +                 | -                 | -                 |
| CYP3A4 inhibition                           | +                 | +                 | -      | -      | +                 | +                 | -                 |
| CYP3A4 substrate                            | +                 | +                 | +      | +      | +                 | +                 | -                 |
| CYP inhibitory promiscuity                  | +                 | +                 | +      | +      | +                 | +                 | +                 |
| Eye corrosion                               | -                 | -                 | -      | -      | -                 | -                 | -                 |
| Eye irritation                              | +                 | -                 | -      | -      | -                 | -                 | -                 |
| Estrogen receptor binding                   | +                 | +                 | +      | +      | +                 | +                 | +                 |
| Glucocorticoid receptor binding             | +                 | +                 | +      | +      | +                 | +                 | +                 |
| Hepatotoxicity                              | +                 | +                 | +      | +      | +                 | +                 | +                 |
| Human Ether-a-go-go-Related Gene inhibition | +                 | +                 | +      | +      | +                 | -                 | -                 |

(cont.)

|                                    |                   |                   |                   |                    |                   |                   |            |
|------------------------------------|-------------------|-------------------|-------------------|--------------------|-------------------|-------------------|------------|
| <b>Human Intestinal Absorption</b> | +                 | +                 | +                 | +                  | +                 | +                 | +          |
| <b>Human oral bioavailability</b>  | +                 | +                 | +                 | +                  | +                 | +                 | +          |
| <b>MATE1 inhibitor</b>             | -                 | -                 | -                 | -                  | -                 | -                 | -          |
| <b>Mitochondrial toxicity</b>      | -                 | +                 | -                 | -                  | +                 | -                 | +          |
| <b>Micronuclear</b>                | +                 | +                 | +                 | +                  | +                 | +                 | +          |
| <b>Nephrotoxicity</b>              | -                 | -                 | +                 | +                  | -                 | -                 | +          |
| <b>Acute Oral Toxicity</b>         | 2.777612209       | 3.192592621       | 3.563766003       | 4.35090971         | 3.287763119       | 2.658835411       | 2.981128   |
| <b>OATP1B1 inhibitor</b>           | +                 | +                 | +                 | +                  | +                 | +                 | +          |
| <b>OATP1B3 inhibitor</b>           | +                 | +                 | +                 | +                  | +                 | +                 | +          |
| <b>OATP2B1 inhibitor</b>           | -                 | -                 | -                 | -                  | -                 | -                 | -          |
| <b>OCT1 inhibitor</b>              | -                 | -                 | -                 | -                  | +                 | -                 | +          |
| <b>OCT2 inhibitor</b>              | -                 | +                 | -                 | -                  | -                 | -                 | +          |
| <b>P-glycoprotein inhibitor</b>    | -                 | +                 | -                 | +                  | +                 | -                 | -          |
| <b>P-glycoprotein substrate</b>    | -                 | +                 | -                 | -                  | +                 | -                 | -          |
| <b>PPAR gamma</b>                  | +                 | +                 | +                 | +                  | +                 | +                 | +          |
| <b>Plasma protein binding</b>      | 1.003971338       | 0.955927551       | 1.032086134       | 0.9817757010000001 | 0.998464346       | 1.035541773       | 0.92094641 |
| <b>Reproductive toxicity</b>       | +                 | +                 | +                 | +                  | +                 | +                 | +          |
| <b>Respiratory toxicity</b>        | -                 | +                 | -                 | +                  | +                 | +                 | +          |
| <b>Skin corrosion</b>              | -                 | -                 | -                 | -                  | -                 | -                 | -          |
| <b>Skin irritation</b>             | -                 | -                 | -                 | -                  | -                 | -                 | -          |
| <b>skin sensitization</b>          | -                 | -                 | -                 | -                  | -                 | -                 | -          |
| <b>Subcellular localization</b>    | Mitochon-<br>dria | Mitochon-<br>dria | Mitochon-<br>dria | Mitochon-<br>dria  | Mitochon-<br>dria | Mitochon-<br>dria | Lysosomes  |
| <b>Thyroid receptor binding</b>    | +                 | +                 | +                 | +                  | +                 | +                 | +          |
| <b>UGT catalyzed</b>               | -                 | -                 | -                 | -                  | -                 | -                 | -          |
| <b>Water solubility</b>            | -3.237773778      | -2.510816114      | -5.165401196      | -5.326074509       | -3.462040937      | -3.853552013      | -          |

<sup>1</sup>Pyrimethamine, used as positive control.
